# Supplementary material for: IonMonger 2.0: software for free, fast and versatile simulation of current, voltage and impedance response of planar perovskite solar cells
Source: Springer Nature journal article supplement (doi:10.1007/s10825-022-01988-5), 2022-11-30
Supplement: MOESM1 [file 23776034]

## Supplementary information for ‘IonMonger 2.0: Software for free, fast and versatile simulation of current, voltage and impedance response of planar perovskite solar cells’

Will Clarke · Laurence J. Bennett · Yoana Grudeva · Jamie  
M. Foster · Giles Richardson · Nicola E. Courtier

Received: date / Accepted: date

---

Will Clarke · Laurence Bennett · Giles Richardson  
Mathematical Sciences, University of Southampton, UK

Nicola E. Courtier  
Engineering Science, University of Oxford, UK

Yoana Grudeva · Jamie M. Foster  
Mathematics and Physics, University of Portsmouth, UK

Corresponding author: Will Clarke  
E-mail: wc3g16@soton.ac.uk

## 1 Tables of symbol definitions

This section contains five tables which contain: 1) the model variables, 2) the computational settings, 3) the dimensional input parameters, 4) the computed properties, and 5) the dimensionless parameters for the IonMonger code.

**Table 1** Table of model variables.

| Symbol       | Description                | Unit                      |
|--------------|----------------------------|---------------------------|
| $n(x, t)$    | Electron concentration     | $\text{m}^{-3}$           |
| $p(x, t)$    | Hole concentration         | $\text{m}^{-3}$           |
| $P(x, t)$    | Iodide ion vacancy density | $\text{m}^{-3}$           |
| $\phi(x, t)$ | Electric potential         | V                         |
| $j^n(x, t)$  | Electron current density   | $\text{Am}^{-2}$          |
| $j^p(x, t)$  | Hole current density       | $\text{Am}^{-2}$          |
| $F^P(x, t)$  | Iodide ion vacancy flux    | $\text{m}^2\text{s}^{-1}$ |
| $E(x, t)$    | Electric field             | $\text{Vm}^{-1}$          |
| $V(t)$       | Applied voltage            | V                         |
| $J(t)$       | Total current density      | $\text{mAcm}^{-2}$        |

**Table 2** Table of computational settings.

| Symbol               | Description                                                |
|----------------------|------------------------------------------------------------|
| $N$                  | Number of subintervals, with $N + 1$                       |
| <code>rtol</code>    | Relative temporal tolerance for <code>ode15s</code> solver |
| <code>atol</code>    | Absolute temporal tolerance for <code>ode15s</code> solver |
| $\phi_{\text{disp}}$ | Dimensionless electric potential offset                    |

**Table 3** Table of input parameters, in which the abbreviation DoS denotes the density of states.

| Symbol                                                           | Description                                       | Unit                         |
|------------------------------------------------------------------|---------------------------------------------------|------------------------------|
| $\varepsilon_0$                                                  | Permittivity of free space                        | $\text{Fm}^{-1}$             |
| $q$                                                              | Elementary charge                                 | C                            |
| $F_{ph}$                                                         | Incident photon flux at 1 Sun                     | $\text{m}^{-2}\text{s}^{-1}$ |
| $k_B$                                                            | Boltzmann constant                                | $\text{eVK}^{-1}$            |
| $T$                                                              | Temperature                                       | K                            |
| $I_s$                                                            | Intensity of incident light                       | Suns                         |
| <b>Perovskite Properties</b>                                     |                                                   |                              |
| $\alpha$                                                         | Absorption coefficient                            | $\text{m}^{-1}$              |
| $b$                                                              | Width                                             | nm                           |
| $\varepsilon_A$                                                  | Permittivity                                      | $\varepsilon_0$              |
| $D_n$                                                            | Electron diffusion coefficient                    | $\text{m}^2\text{s}^{-1}$    |
| $D_p$                                                            | Hole diffusion coefficient                        | $\text{m}^2\text{s}^{-1}$    |
| $E_C$                                                            | Conduction band minimum                           | eV                           |
| $E_V$                                                            | Valence band maximum                              | eV                           |
| $g_c$                                                            | Conduction band effective DoS                     | $\text{m}^{-3}$              |
| $g_v$                                                            | Valence band effective DoS                        | $\text{m}^{-3}$              |
| $D_I$                                                            | Iodide ion vacancy diffusion coefficient          | $\text{m}^2\text{s}^{-1}$    |
| $\hat{N}_0$                                                      | Mean density of ion vacancies                     | $\text{m}^{-3}$              |
| $\beta$                                                          | Bimolecular rate constant                         | $\text{m}^3\text{s}^{-1}$    |
| $\tau_n$                                                         | Electron SRH pseudo-lifetime                      | s                            |
| $\tau_p$                                                         | Hole SRH pseudo-lifetime                          | s                            |
| <b>Interface Properties</b> (interface indicated by superscript) |                                                   |                              |
| $\beta^{E,H}$                                                    | Bimolecular rate constant                         | $\text{m}^3\text{s}^{-1}$    |
| $\nu_n^{E,H}$                                                    | Electron recombination velocity towards interface | $\text{ms}^{-1}$             |
| $\nu_p^{E,H}$                                                    | Hole recombination velocity towards interface     | $\text{ms}^{-1}$             |
| <b>ETL Properties</b>                                            |                                                   |                              |
| $b_E$                                                            | Width                                             | nm                           |
| $d_E$                                                            | Effective doping density                          | $\text{m}^{-3}$              |
| $D_E$                                                            | Electron diffusion coefficient                    | $\text{m}^2\text{s}^{-1}$    |
| $\varepsilon_E$                                                  | Permittivity                                      | $\varepsilon_0$              |
| $E_c^E$                                                          | Conduction band reference energy                  | eV                           |
| $g_c^E$                                                          | Conduction band effective DoS                     | $\text{m}^{-3}$              |
| <b>HTL Properties</b>                                            |                                                   |                              |
| $b_H$                                                            | Width                                             | nm                           |
| $d_H$                                                            | Effective doping density                          | $\text{m}^{-3}$              |
| $D_H$                                                            | Hole diffusion coefficient                        | $\text{m}^2\text{s}^{-1}$    |
| $\varepsilon_H$                                                  | Permittivity                                      | $\varepsilon_0$              |
| $E_v^H$                                                          | Valence band reference energy                     | eV                           |
| $g_v^H$                                                          | Valence band effective DoS                        | $\text{m}^{-3}$              |

**Table 4** Table of optional input parameters supported with v2.0. If these parameters are omitted, they will be set to their default values.

| Symbol         | Description                                 | Default value                      | Unit                      |
|----------------|---------------------------------------------|------------------------------------|---------------------------|
| $S_E$          | ETL statistical integral                    | exp                                | dimensionless             |
| $S_H$          | HTL statistical integral                    | exp                                | dimensionless             |
| $E_{ct}$       | Cathode workfunction                        | $E_f^E$                            | eV                        |
| $E_{an}$       | Anode workfunction                          | $E_f^H$                            | eV                        |
| $A_n$          | Electron-dominated Auger recombination rate | 0                                  | $\text{m}^6\text{s}^{-1}$ |
| $A_p$          | Hole-dominated Auger recombination rate     | 0                                  | $\text{m}^6\text{s}^{-1}$ |
| $R_s$          | External series resistance                  | 0                                  | $\Omega$                  |
| $R_p$          | Shunt/parallel resistance                   | Inf                                | $\Omega$                  |
| $A$            | Cell area                                   | 1                                  | $\text{cm}^2$             |
| $E_f^E = -W_E$ | ETL work function (overrides $d_E$ )        | $E_c^E + V_T S_E^{-1} (d_E/g_c^E)$ | eV                        |
| $E_f^H = -W_H$ | HTL work function (overrides $d_H$ )        | $E_v^H - V_T S_H^{-1} (d_H/g_v^H)$ | eV                        |

**Table 5** Table of computed properties.

| <b>Symbol</b>         | <b>Description</b>                                         | <b>Unit</b>                  |
|-----------------------|------------------------------------------------------------|------------------------------|
| $E_{f_E}$ (or $d_E$ ) | Fermi level in the ETL (or ETL effective doping density)   | eV (or $\text{m}^{-3}$ )     |
| $E_{f_H}$ (or $d_H$ ) | Fermi level in the HTL (or HTL effective doping density)   | eV (or $\text{m}^{-3}$ )     |
| $L_D$                 | Perovskite Debye length                                    | nm                           |
| $G(x, t)$             | Photo-generation rate                                      | $\text{m}^{-3}\text{s}^{-1}$ |
| $G_0$                 | Typical generation rate                                    | $\text{m}^{-3}\text{s}^{-1}$ |
| $k_E$                 | Typical electron ratio across ETL interface                | -                            |
| $k_H$                 | Typical hole ratio across HTL interface                    | -                            |
| $n_0$                 | Typical electron concentration in perovskite ( $k_E d_E$ ) | $\text{m}^{-3}$              |
| $p_0$                 | Typical hole concentration in perovskite ( $k_H d_H$ )     | $\text{m}^{-3}$              |
| $R(x, t)$             | Bulk recombination rate                                    | $\text{m}^{-3}\text{s}^{-1}$ |
| $R_l(t)$              | ETL/perovskite interface recombination flux                | $\text{m}^{-2}\text{s}^{-1}$ |
| $R_r(t)$              | Perovskite/HTL interface recombination flux                | $\text{m}^{-2}\text{s}^{-1}$ |
| $\tau_{ion}$          | Characteristic timescale                                   | s                            |
| $V_{bi}$              | Built-in voltage                                           | V                            |
| $V_T$                 | Thermal voltage                                            | V                            |

## 2 Typical parameter values for a TiO<sub>2</sub>/MAPI/spiro-MeOTAD cell

| Symbol                       | Name                          | Values               | Unit                      | Ref. |
|------------------------------|-------------------------------|----------------------|---------------------------|------|
| T                            | Temperature                   | 298                  | K                         |      |
| -                            | Light entering through        | ETL                  | -                         |      |
| <b>Perovskite (MAPI)</b>     |                               |                      |                           |      |
| $b$                          | Perovskite width              | 400                  | nm                        |      |
| $\epsilon_p$                 | Permittivity                  | 24.1                 | $\epsilon_0$              | [1]  |
| $\alpha$                     | Absorption coefficient        | $1.3 \times 10^7$    | $\text{m}^{-1}$           | [6]  |
| $g_c$                        | Conduction band effective DoS | $8.1 \times 10^{24}$ | $\text{m}^{-3}$           | [1]  |
| $g_v$                        | Valence band effective DoS    | $5.8 \times 10^{24}$ | $\text{m}^{-3}$           | [1]  |
| $E_c$                        | Conduction band edge          | -3.7                 | eV                        | [10] |
| $E_v$                        | Valence band edge             | -5.4                 | eV                        | [10] |
| $D_n$                        | Electron diffusivity          | $1.7 \times 10^{-4}$ | $\text{m}^2\text{s}^{-1}$ | [11] |
| $D_p$                        | Hole diffusivity              | $1.7 \times 10^{-4}$ | $\text{m}^2\text{s}^{-1}$ | [11] |
| $N_0$                        | Mean anion vacancy density    | $1.6 \times 10^{25}$ | $\text{m}^{-3}$           | [4]  |
| $D_P$                        | Anion vacancy diffusivity     | $1 \times 10^{-17}$  | $\text{m}^2\text{s}^{-1}$ |      |
| <b>ETL (TiO<sub>2</sub>)</b> |                               |                      |                           |      |
| $g_c^E$                      | Conduction band effective DoS | $2 \times 10^{23}$   | $\text{m}^{-3}$           | [7]  |
| $d_E$                        | Effective doping density      | $2 \times 10^{22}$   | $\text{m}^{-3}$           |      |
| $D_E$                        | Electron diffusivity          | $1.3 \times 10^{-5}$ | $\text{m}^2\text{s}^{-1}$ | [12] |
| $\epsilon_E$                 | Permittivity                  | 10                   | $\epsilon_0$              |      |
| $b_E$                        | ETL width                     | 100                  | nm                        |      |
| $E_c^E$                      | Conduction band edge          | -4.13                | eV                        | [2]  |
| <b>HTL (spiro-MeOTAD)</b>    |                               |                      |                           |      |
| $g_v^H$                      | Valence band effective DoS    | $1 \times 10^{26}$   | $\text{m}^{-3}$           | [8]  |
| $d_H$                        | Effective doping density      | $1 \times 10^{25}$   | eV                        |      |
| $D_H$                        | Hole diffusivity              | $1 \times 10^{-6}$   | $\text{m}^2\text{s}^{-1}$ | [12] |
| $\epsilon_H$                 | Permittivity                  | 3                    | $\epsilon_0$              |      |
| $b_H$                        | HTL width                     | 200                  | nm                        |      |
| $E_v^H$                      | Valence band edge             | -5.1                 | eV                        | [3]  |

**Table 6** Material parameters representative of a typical TiO<sub>2</sub>/MAPI/spiro-MeOTAD cell with standard architecture. When non-Boltzmann statistics are used, the TiO<sub>2</sub> is assumed to have parabolic bands and the spiro-MeOTAD is assumed to have Gaussian bands with width  $s = 3.73$  [5,9,13].

| Symbol                          | Name                            | Values                | Unit                      |
|---------------------------------|---------------------------------|-----------------------|---------------------------|
| <b>Perovskite bulk</b>          |                                 |                       |                           |
| $\beta$                         | Bi-molecular rate constant      | $1.5 \times 10^{-14}$ | $\text{m}^3\text{s}^{-1}$ |
| $\tau_p$                        | Hole SRH psuedo-lifetime        | $3 \times 10^{-7}$    | s                         |
| $\tau_n$                        | Electron SRH psuedo-lifetime    | $3 \times 10^{-7}$    | s                         |
| $A_n$                           | Electron Auger coefficient      | 0                     | $\text{m}^6\text{s}^{-1}$ |
| $A_p$                           | Hole Auger coefficient          | 0                     | $\text{m}^6\text{s}^{-1}$ |
| <b>ETL/perovskite interface</b> |                                 |                       |                           |
| $\nu_p^E$                       | Hole recombination velocity     | 10                    | $\text{ms}^{-1}$          |
| $\nu_n^E$                       | Electron recombination velocity | $10^5$                | $\text{ms}^{-1}$          |
| $\beta_E$                       | Bi-molecular rate constant      | 0                     | $\text{m}^4\text{s}^{-1}$ |
| <b>HTL/perovskite interface</b> |                                 |                       |                           |
| $\nu_p^H$                       | Hole recombination velocity     | $10^5$                | $\text{ms}^{-1}$          |
| $\nu_n^H$                       | Electron recombination velocity | 0.1                   | $\text{ms}^{-1}$          |
| $\beta_H$                       | Bi-molecular rate constant      | 0                     | $\text{m}^4\text{s}^{-1}$ |

**Table 7** Recombination parameters for a typical TiO<sub>2</sub>/MAPI/spiro-MeOTAD cell.

## References

1. F. BRIVIO, K. T. BUTLER, A. WALSH, AND M. VAN SCHILFGARDE, *Relativistic quasiparticle self-consistent electronic structure of hybrid halide perovskite photovoltaic absorbers*, Physical Review B, 89 (2014).
2. M. M. BYRANVAND, T. KIM, S. SONG, G. KANG, S. U. RYU, ET AL., *p-type CuI islands on TiO<sub>2</sub> electron transport layer for a highly efficient planar-perovskite solar cell with negligible hysteresis*, Advanced Energy Materials, 8 (2018), p. 1702235.
3. W.-J. CHI, Q.-S. LI, AND Z.-S. LI, *Exploring the electrochemical properties of hole transport materials with spiro-cores for efficient perovskite solar cells from first-principles*, Nanoscale, 8 (2016), pp. 6146–6154.
4. M. H. FUTSCHER, J. M. LEE, L. MCGOVERN, L. A. MUSCARELLA, T. WANG, ET AL., *Quantification of ion migration in CH<sub>3</sub>NH<sub>3</sub>PbI<sub>3</sub> perovskite solar cells by transient capacitance measurements*, Materials Horizons, 6 (2019), pp. 1497–1503.
5. J. KIRKPATRICK AND J. NELSON, *Theoretical study of the transfer integral and density of states in spiro-linked triphenylamine derivatives*, The Journal of Chemical Physics, 123 (2005), p. 084703.
6. P. LÖPER, M. STUCKELBERGER, B. NIESEN, J. WERNER, M. FILIPIČ, ET AL., *Complex refractive index spectra of CH<sub>3</sub>NH<sub>3</sub>PbI<sub>3</sub> perovskite thin films determined by spectroscopic ellipsometry and spectrophotometry*, The Journal of Physical Chemistry Letters, 6 (2015), pp. 66–71.
7. R. T. MOUCHOU, T. C. JEN, O. T. LASEINDE, AND K. O. UKOBA, *Numerical simulation and optimization of p-NiO/n-TiO<sub>2</sub> solar cell system using SCAPS*, Materials Today: Proceedings, 38 (2021), pp. 835–841.
8. K. A. PETERSON, A. PATTERSON, A. VEGA-FLICK, B. LIAO, AND M. L. CHABINYC, *Doping molecular organic semiconductors by diffusion from the vapor phase*, Materials Chemistry Frontiers, 4 (2020), pp. 3632–3639.
9. X. SALLENAVE, M. SHASTI, E. H. ANARAKI, D. VOLYNIUK, J. V. GRAZULEVICIUS, ET AL., *Interfacial and bulk properties of hole transporting materials in perovskite solar cells: spiro-MeTAD versus spiro-OMeTAD*, Journal of Materials Chemistry A, 8 (2020), pp. 8527–8539.
10. P. SCHULZ, E. EDRI, S. KIRMAYER, G. HODES, D. CAHEN, ET AL., *Interface energetics in organo-metal halide perovskite-based photovoltaic cells*, Energy & Environmental Science, 7 (2014), p. 1377.
11. C. C. STOUMPOS, C. D. MALLIAKAS, AND M. G. KANATZIDIS, *Semiconducting tin and lead iodide perovskites with organic cations: Phase transitions, high mobilities, and near-infrared photoluminescent properties*, Inorganic Chemistry, 52 (2013), pp. 9019–9038.
12. H. WANG, G. WU, X. CAI, Y. ZHAO, Z. SHI, ET AL., *Effect of growth temperature on structure and optical characters of NiO films fabricated by PA-MOCVD*, Vacuum, 86 (2012), pp. 2044–2047.
13. I. YAVUZ AND K. N. HOUK, *Mesoscale ordering and charge-transport of crystalline Spiro-OMeTAD organic semiconductors*, The Journal of Physical Chemistry C, 121 (2017), pp. 993–999.
